# Supplementary material
Source: PubMed Central journal article supplement (PMC7531612)
Supplement: NIHMS1629923-supplement-1.pdf [file NIHMS1629923-supplement-1.pdf]

# Supplementary Figure S1

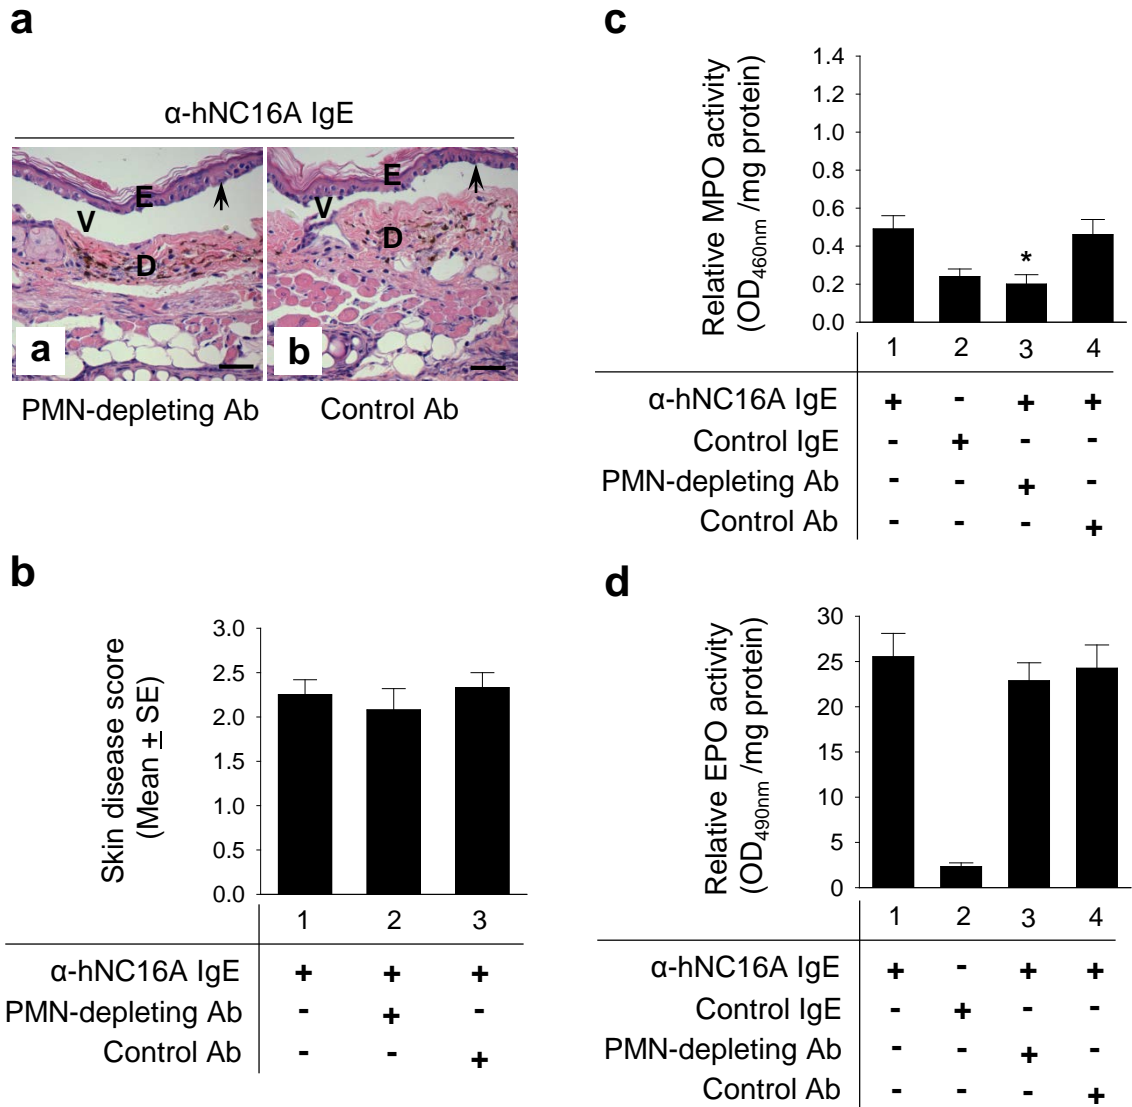

**Supplementary Figure S1. Anti-hNC16A IgE-induced BP in hFc $\epsilon$ R/hNC16A mice is independent of neutrophils.** Eight week old hFc $\epsilon$ RI/hNC16A mice were pretreated with i.p. injection of PMN-depleting antibody or isotype control antibody and then injected at the ear pinna with anti-hNC16A IgE or control IgE (100 ng/g body weight). Mice were examined 48 h later after IgE injection. **(a)** H/E. Mice pretreated with PMN depleting antibody or isotype control antibody showed similar dermal-epidermal separation. **(b)** Skin disease activity. Mice treated with PMN depleting antibody (bar 2) developed the same BP disease as isotype control antibody treated mice (bar 3) and mice without any pretreatment (bar 1). **(c)** PMN infiltration. MPO activity assay showed significant difference in PMN infiltration between PMN depleting- and isotype control antibody-treated mice (bar 4 vs. 3). **(d)** Eos infiltration. EPO activity assay showed compatible Eos infiltration between PMN depleting and isotype control antibody treated mice (bar 3 vs. 4). Scale bars = 100  $\mu$ m for panel a. \* $p$ <0.01,  $n$ =6 for each group.

## **SUPPLEMENTAL MATERIALS**

### **MATERIALS AND METHODS**

#### **Mice**

The humanized hNC16A mice were generated as described (Liu et al., 2008). The humanized hFcεRI mice were generated by the replacement of the *Fcεr1a* mouse locus with the syntenic human FCER1A locus (see Figure 3a). Briefly, Homologous recombination is used to generate an approximately 9.5 kb deletion of mouse DNA from chromosome 1 extending from 173,219,342 to 173,228,893 (GRCM38-mm10). This includes the promoter and all exons and introns of the mouse gene. The deleted region is repopulated with the corresponding 44 kb human locus extending from human chromosome 1 159,268,197 to 159,311,999 (GRCh38-hg38). The larger size of the human locus reflect the more complex 5' structure of this gene. The human FCER1 is driven under its own promoter elements. The genetic manipulations leave a nonfunctional mutant loxP site at the junction between the *Olfcr* gene and the human segment of DNA and a FRT site (yellow triangle) at the second junction between human and mouse DNA. Probe A indicates the location of the DNA probe to verify the humanization of the *Fcεr1a* locus. hFcεRI/hNC16A mice were generated by crossing hNC16A with hFcεRI mice. Expression of hFcεRI on affinity purified eosinophils was confirmed by using a two-step stain with human IgE incubation followed by FITC-labeled anti-human IgE antibody (Thermofisher Scientific, cat#H15701). Eosinophil-deficient  $\Delta$ dblGATA mice (Yu *et al.*, 2002) were obtained from the Jackson Laboratories (Bar Harbor, ME) and crossed with hFcεRI/hNC16A mice to generate eosinophil-deficient hFcεRI/hNC16A mice.

#### **Clinical disease scoring**

The extent of cutaneous disease (clinical disease activity) in anti-BP180 antibody-injected neonatal mice was scored as follows: "(-)", no detectable skin disease; "1+", mild erythematous reaction with no evidence of the "epidermal detachment" sign; "2+", intense erythema and "epidermal detachment" sign involving 10-50% of the epidermis in localized areas; and "3+", intense erythema with frank "epidermal detachment" sign involving more than 50% of the epidermis. The disease activity in adult mice was scored based on dermal-epidermal separation by H/E: "(-)", no detectable dermal-epidermal separation; "1+", mild inflammatory reaction and <25% epidermal detachment; "2+", intense inflammatory reaction and epidermal detachment involving 25% to 50% of the epidermis; and "3+", intense inflammatory reaction with frank "epidermal detachment" sign involving more than 50% of the epidermis.

### **Immunoblotting**

Recombinant hNC16A was subjected to SDS-PAGE. Following transfer to nitrocellulose, the membrane was probed with anti-hNC16A IgG, anti-hNC16A IgE, or control IgE and bound antibody was detected with anti-human IgG (Southern Biotechnology, cat#2040-05) or anti-human IgE (Sigma-Aldrich, cat#A9667) HRP conjugated secondary antibodies.

### **Indirect and direct immunofluorescence**

For indirect immunofluorescence, anti-hNC16A IgG and IgE (1µg/ml) were incubated with skin sections of hNC16A mice. Binding of anti-hNC16A IgG and IgE to the BMZ was detected by FITC-conjugated anti-human IgG and IgE antibodies (ThermoFisher Scientific, cat# 62-8411, cat# H15801). For direct immunofluorescence, BMZ bound human IgG or IgE was detected using commercially available FITC-conjugated anti-human IgG and anti-human IgE Fc antibodies (Thermo Fisher Scientific cat# H15701). Eosinophils were detected using rat anti-mouse MPB

monoclonal antibody (provided by Dr. J. Lee, Mayo Clinic Arizona), followed by Alexa Fluor 488-conjugated goat anti-rat antibody (Life Technologies, cat#a11006).

### **Eosinophil activation in vitro**

Eosinophil superoxide production (oxidative burst) *in vitro* was measured by reduction of cytochrome *c* as described with some minor modification (Kobayashi *et al.*, 2003). Briefly, freshly isolated eosinophils were resuspended in HBSS with 0.03% gelatin, 10mM HEPES and 200mM cytochrome *c* (Sigma-Aldrich, St. Louis, MO) at  $5 \times 10^5$  cells/ml; 100 $\mu$ l of cell suspension was dispensed into each well of 96-well flat-bottom microplate. The reactions were initiated at 37°C with 100 $\mu$ l of PMA (Calbiochem, La Jolla, CA) at 0-20ng/ml. Absorbance at 550nm was read every 10min for 2h in a microplate reader (Molecular Devices, Sunnyvale, CA). EPO release by eosinophils (eosinophil degranulation) in response to challenge with PAF was determined using a peroxidase assay as described (Adamko *et al.*, 2004; Dyer *et al.*, 2010). Briefly, freshly isolated eosinophils were resuspended in RPMI 1640, without phenol red, at  $5 \times 10^5$  cells/ml; 100 $\mu$ l of cell suspension was dispensed into each well of 96-well flat-bottom microplate. Cells were incubated at 37°C, 5% CO<sub>2</sub> for 30min in the absence or presence of PAF (0-10 $\mu$ M), 100 $\mu$ l *o*-phenylenediamine (OPD) reagent (800 $\mu$ l 5mM OPD in 4ml 1M Tris, pH8, 5.2ml H<sub>2</sub>O), and 1.25 $\mu$ l 30% H<sub>2</sub>O<sub>2</sub>). The reaction was terminated by the addition of 100 $\mu$ l 4M H<sub>2</sub>SO<sub>4</sub> to each well and read at 492nm. The baseline EPO content was cells without treatment, while the total EPO content was cells lysed in 0.2% SDS. Eosinophil degranulation are expressed as the percentage of total EPO [(absorbance of stimulated sample – untreated control)/total EPO content X 100].

### **SUPPLEMENTAL REFERENCES**

Adamko DJ, Wu Y, Gleich GJ, Lacy P, Moqbel R. The induction of eosinophil peroxidase release: improved methods of measurement and stimulation. *J Immunol Methods* 2004;291:101-8.

Dyer KD, Percopo CM, Xie Z, Yang Z, Kim JD, Davoine F, et al. Mouse and human eosinophils degranulate in response to platelet-activating factor (PAF) and lysoPAF via a PAF-receptor-independent mechanism: evidence for a novel receptor. *J Immunol* 2010;184:6327-34.

Kobayashi T, Iijima K, Kita H. Marked airway eosinophilia prevents development of airway hyper-responsiveness during an allergic response in IL-5 transgenic mice. *J Immunol* 2003;170:5756-63.

Liu Z, Sui W, Zhao M, Li Z, Li N, Thresher R, et al. Subepidermal blistering induced by human autoantibodies to BP180 requires innate immune players in a humanized bullous pemphigoid mouse model. *J Autoimmun* 2008;31:331-8.

Yu C, Cantor AB, Yang H, Browne C, Wells RA, Fujiwara Y, et al. Targeted deletion of a high-affinity GATA-binding site in the GATA-1 promoter leads to selective loss of the eosinophil lineage in vivo. *J Exp Med* 2002;195:1387-95.
